# Supplementary material for: In utero exposure to maternal smoking is associated with DNA methylation alterations and reduced neuronal content in the developing fetal brain
Source: PubMed Central journal article supplement (PMC5270321; doi:10.1186/s13072-017-0111-y), 2017-01-26
Supplement: 13072_2017_111_MOESM1_ESM.pdf [file 13072_2017_111_MOESM1_ESM.pdf]

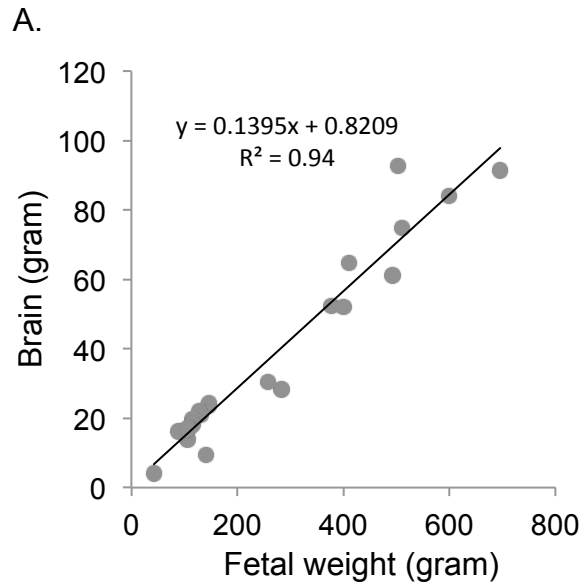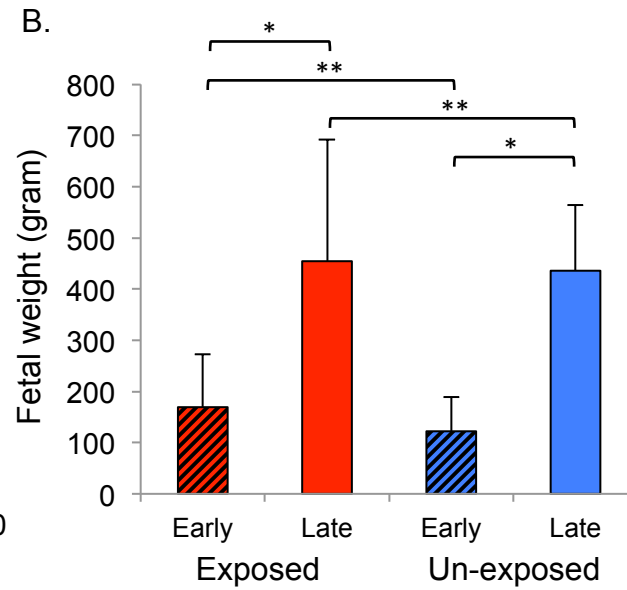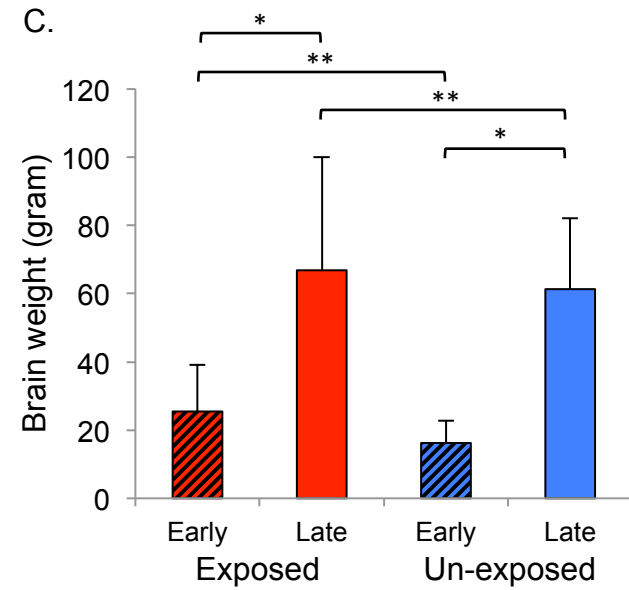

Supplementary Figure 1.
